# Supplementary material for: Encapsulation of Electrically Conductive Apparel Fabrics: Effects on Performance
Source: MDPI journal article supplement (doi:10.3390/s20154243), 2020-07-30
Supplement: s1 [file s1]

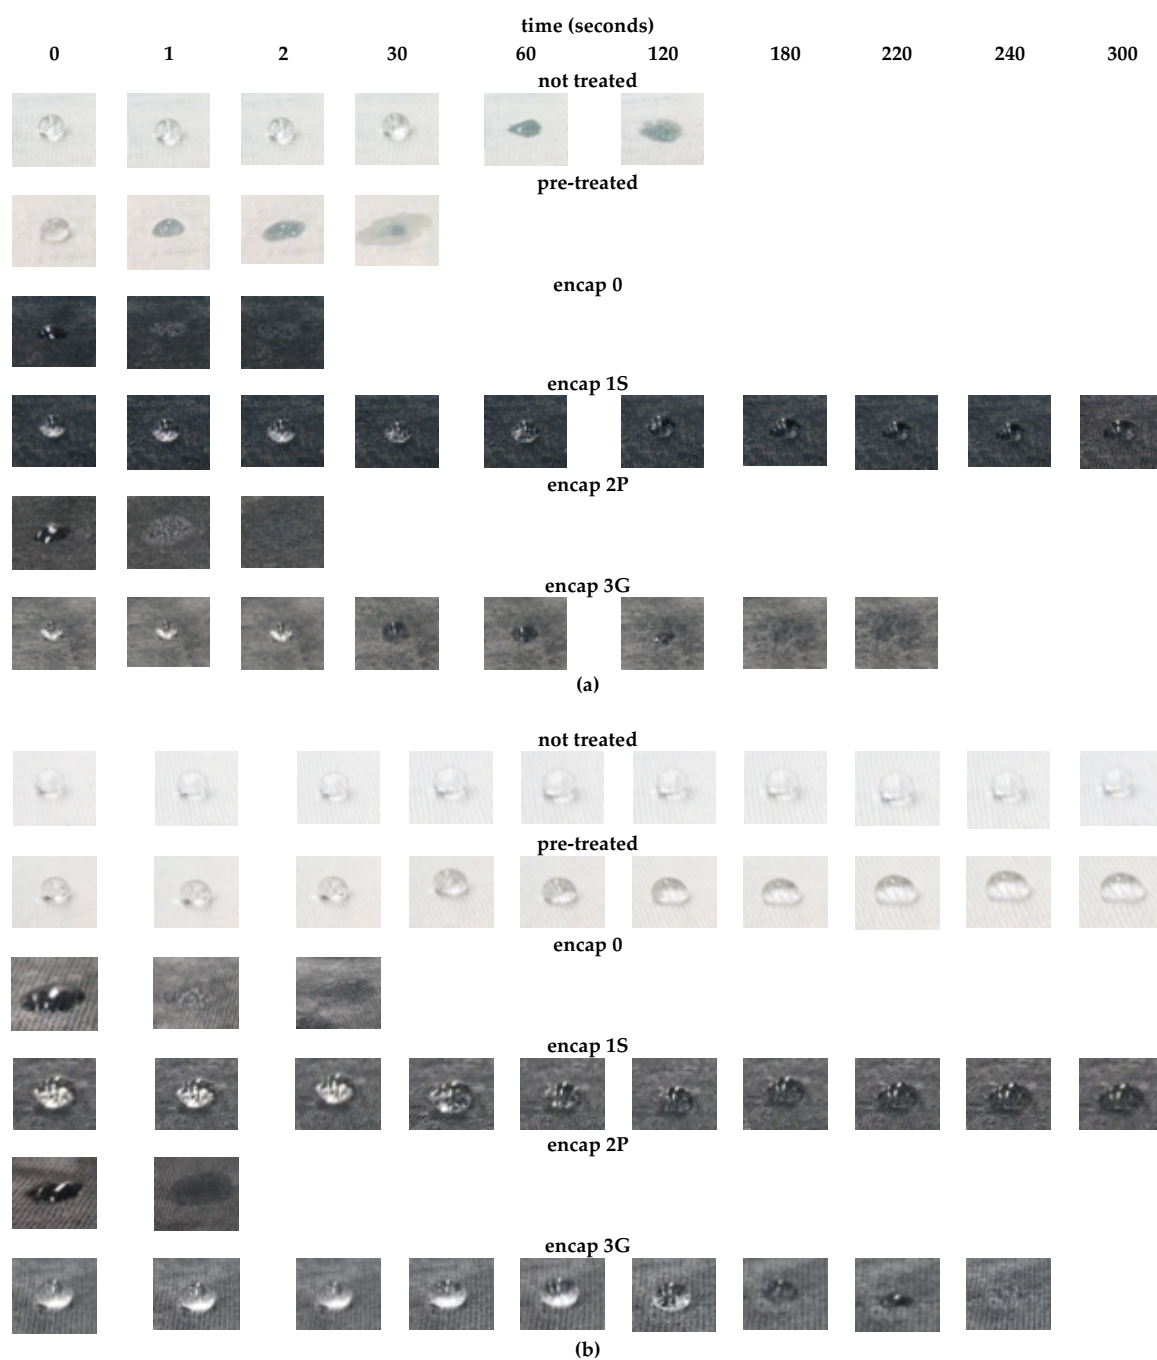

**Figure S1.** Appearance of water droplets over time (intervals selected to show change in shape and absorption of water droplets). **(a)** Wool. **(b)** Cotton.

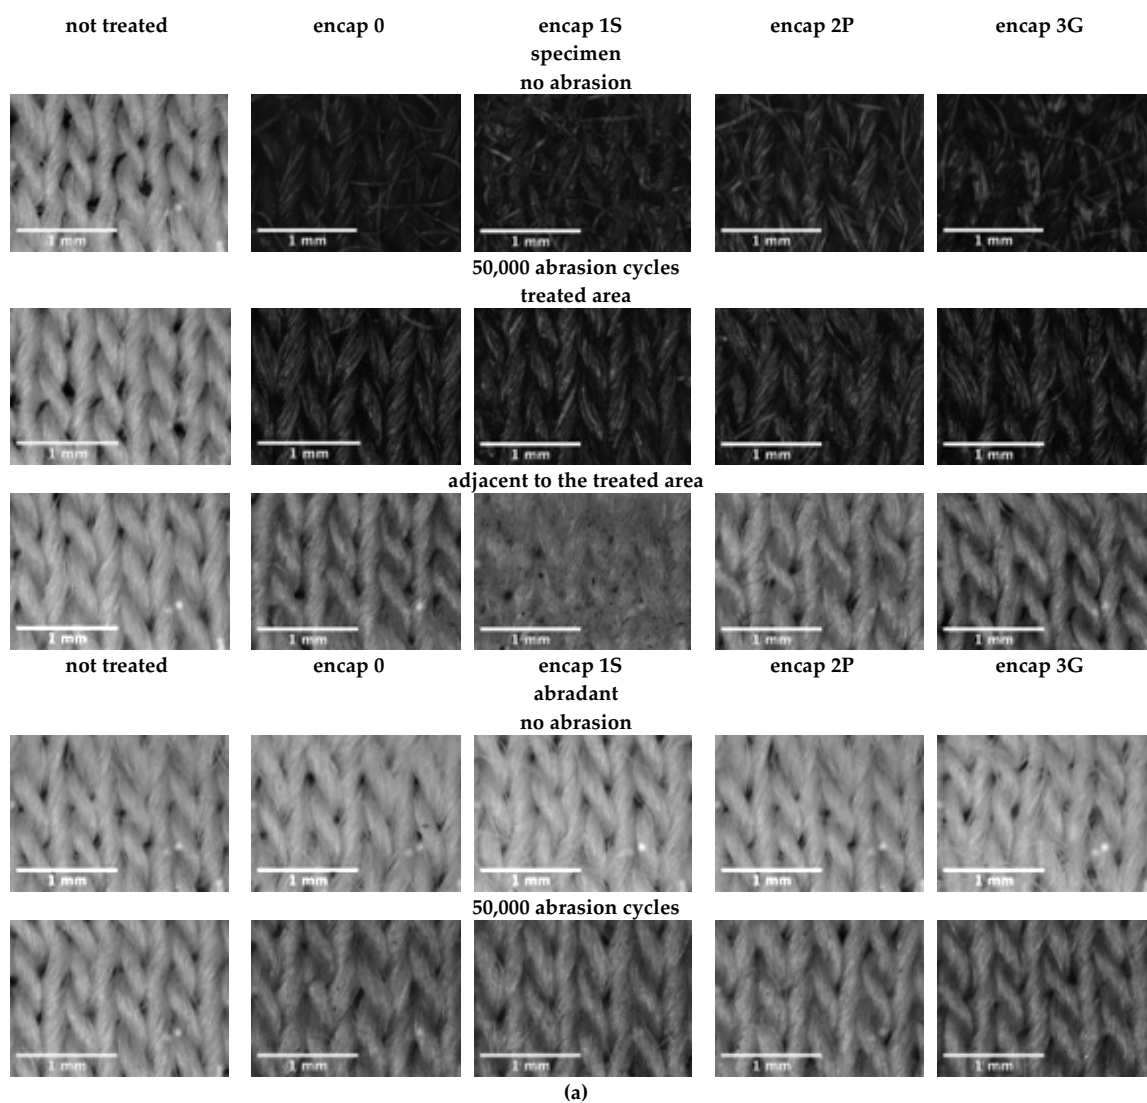

**Figure S2.** Effect of abrasion on wool fabric surface.
